# Supplementary material for: Dairy streptococcal cell wall and exopolysaccharide genome diversity
Source: PubMed Central journal article supplement — Microb Genom. 2022 Apr 20;8(4):000803. doi: 10.1099/mgen.0.000803 (PMC9453073; doi:10.1099/mgen.0.000803), 2022-04-20
Supplement: mgen-8-0803-s001.pdf [file mgen-8-0803-s001.pdf]

**Table S1.** Genbank accession number of *S. thermophilus* strains genome and phageome raw data.

| <b>Strain isolated in this study</b> | <b>RGP type</b> | <b>Accession number</b> |
|--------------------------------------|-----------------|-------------------------|
| Moz111                               | A               | JAHBRN000000000         |
| Brie16                               | A               | JAHBRO000000000         |
| Moz86                                | A               | JAHBRP000000000         |
| Moz83                                | A               | JAHBRQ000000000         |
| Rico66                               | A               | JAHDUN000000000         |
| Brie28                               | A               | JAHDUO000000000         |
| Moz76                                | A               | JAHABD000000000         |
| FDL19                                | A               | JAHABE000000000         |
| Moz109                               | B               | CP075363                |
| Brie1                                | B               | JAHBRI000000000         |
| Vach57                               | B               | JAHBRJ000000000         |
| Vach60                               | B               | JAHBRK000000000         |
| Rico65                               | B               | JAHBRL000000000         |
| Strac48                              | B               | JAHBRM000000000         |
| Nect1                                | C               | JAHDUP000000000         |
| Scam27                               | C               | JAHDUQ000000000         |
| Strac42                              | C               | JAHDUR000000000         |
| Racle124                             | C               | JAHDUS000000000         |
| Nect13                               | C               | JAHDUT000000000         |
| FDL17                                | C               | JAHABF000000000         |
| Moz77                                | E               | JAHDUU000000000         |
| Moz74                                | E               | JAHDUV000000000         |
| Roque89                              | E               | JAHABG000000000         |
| Douc24                               | E               | JAHABH000000000         |

  

| <b>Reference strain</b> | <b>Accession number</b> |
|-------------------------|-------------------------|
| SMQ301                  | CP011217.1              |
| ND03                    | CP002340.1              |
| MN-BM-A01               | CP012588.1              |
| EU01                    | CP047191.1              |
| N4L                     | LS974444.1              |
| TK-P3A                  | CP045596.1              |
| STCH_20                 | MK483556.1              |
| STH_CIRM_1048           | LR822033.1              |
| MN-ZLW-002              | CP003499.1              |

  

| <b>Virome</b>      | <b>Food Type</b> | <b>Accession number</b> |
|--------------------|------------------|-------------------------|
| Brie               | Soft cheese      | PRJNA731044             |
| Mozzarella B       |                  | PRJNA729649             |
| Ricotta            |                  | PRJNA731045             |
| Stracciatella      |                  | PRJNA731053             |
| Vacherin           |                  | PRJNA731055             |
| Semi-soft cheese D | Semi-soft cheese | PRJNA731056             |
| Semi-soft cheese A |                  | PRJNA731057             |
| Blue cheese        |                  | PRJNA731046             |

**Table S2.** List of primer used in this study.

| <b>16S rRNA primer</b> | <b>Sequence (5' to 3')</b> | <b>Reference</b>         |                 |                        |
|------------------------|----------------------------|--------------------------|-----------------|------------------------|
| Luc <i>Fw</i>          | CTTGTTACGACTTCACCC         | Corsetti et al. 2004 [1] |                 |                        |
| Luc <i>Rv</i>          | TGCCTAATACATGCAAGT         |                          |                 |                        |
| <b>RGP primer</b>      | <b>Sequence (5' to 3')</b> | <b>Product size (bp)</b> | <b>RGP type</b> | <b>Reference</b>       |
| RGPpos <i>Fw</i>       | CAGGTGCAAATGGCCAACCTCG     | 801                      | Control         | Kouwen et al. 2019 [2] |
| RGPpos <i>Rv</i>       | CTTGCCATGTTGGGATGAC        |                          |                 |                        |
| RGPgroup-1 <i>Fw</i>   | GGATGATGGTTCGACGGATAG      | 631                      | 1 (B)           |                        |
| RGPgroup-1 <i>Rv</i>   | CCGCTCTTCCAAAACCATGA       |                          |                 |                        |
| RGPgroup-2 <i>Fw</i>   | GTGAAGAGTCAGAAGACGAAT      | 464                      | 2 (A)           |                        |
| RGPgroup-2 <i>Rv</i>   | CAAAGGCCCCGATGGTATT        |                          |                 |                        |
| RGPgroup-3 <i>Fw</i>   | GAGGAAGCAACAGATAAACGA      | 303                      | 3 (D)           |                        |
| RGPgroup-3 <i>Rv</i>   | GACCAATTGGTCCACAAAAGT      |                          |                 |                        |
| RGPgroup-4 <i>Fw</i>   | CTCCTCGTACTCACCCAC         | 162                      | 4 (C/E)         |                        |
| RGPgroup-4 <i>Rv</i>   | GCACAAGATACAGCTCGTTAC      |                          |                 |                        |

**Table S3.** Number of total filtered reads in virome cheese samples.

| <b>Sample name</b> | <b>Total filtered reads</b> |
|--------------------|-----------------------------|
| Brie               | 2,852,252                   |
| Mozarella B        | 3,256,352                   |
| Ricotta            | 2,223,726                   |
| Straciatella       | 3,483,685                   |
| Vacherin           | 4,755,471                   |
| Semi-soft cheese D | 1,056,334                   |
| Semi-soft cheese A | 2,409,371                   |
| Blue cheese        | 3,303,896                   |

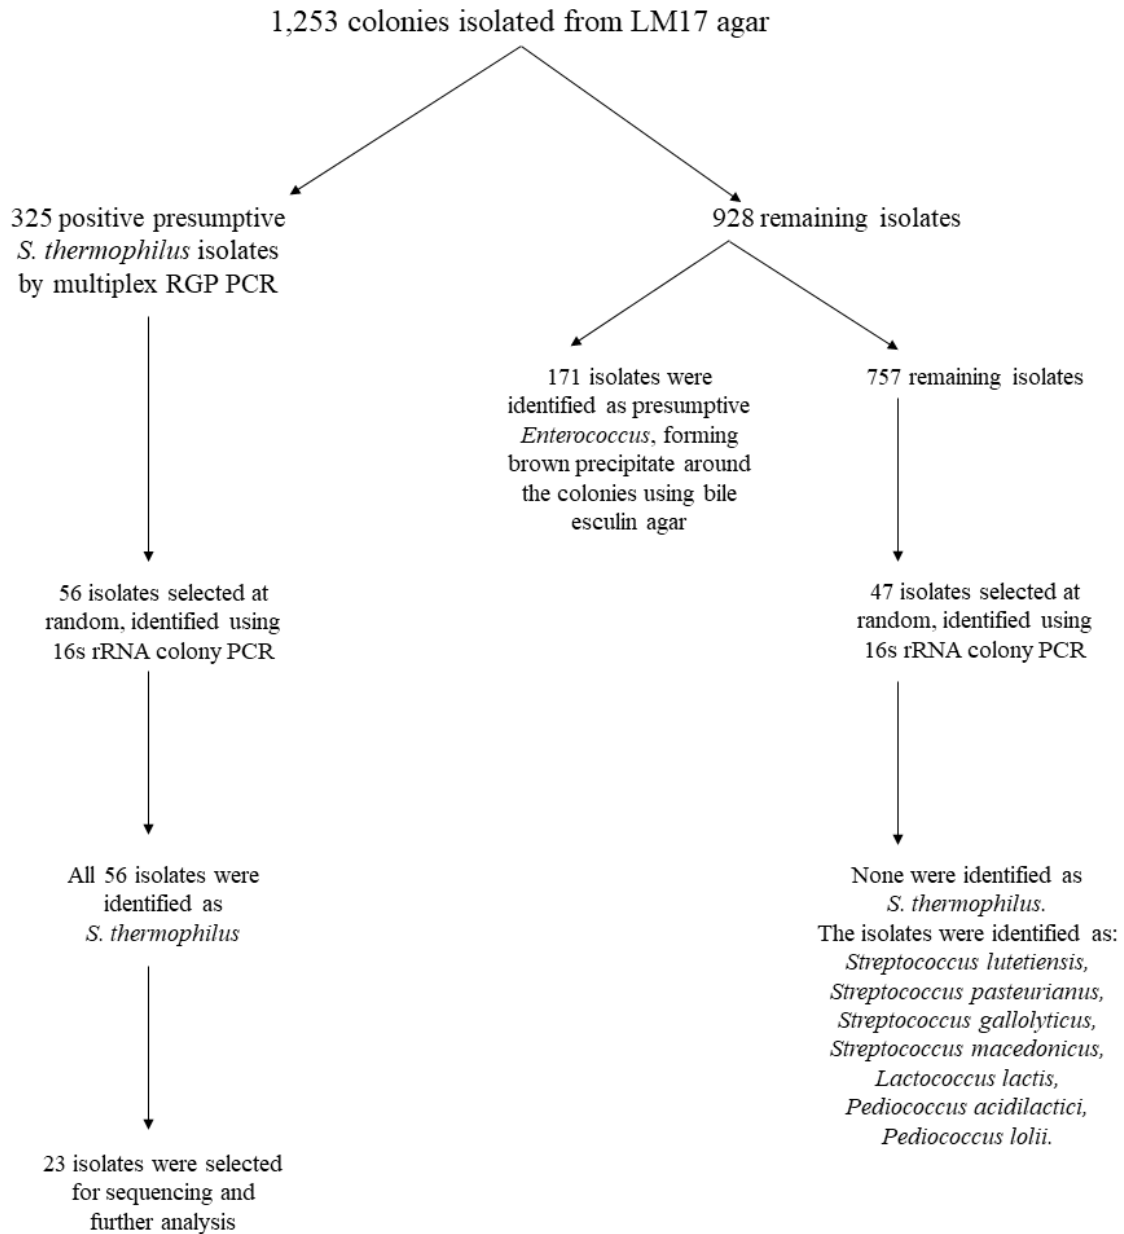

**Figure S1.** Schematic diagram of *S. thermophilus* screening and isolation performed in this study.

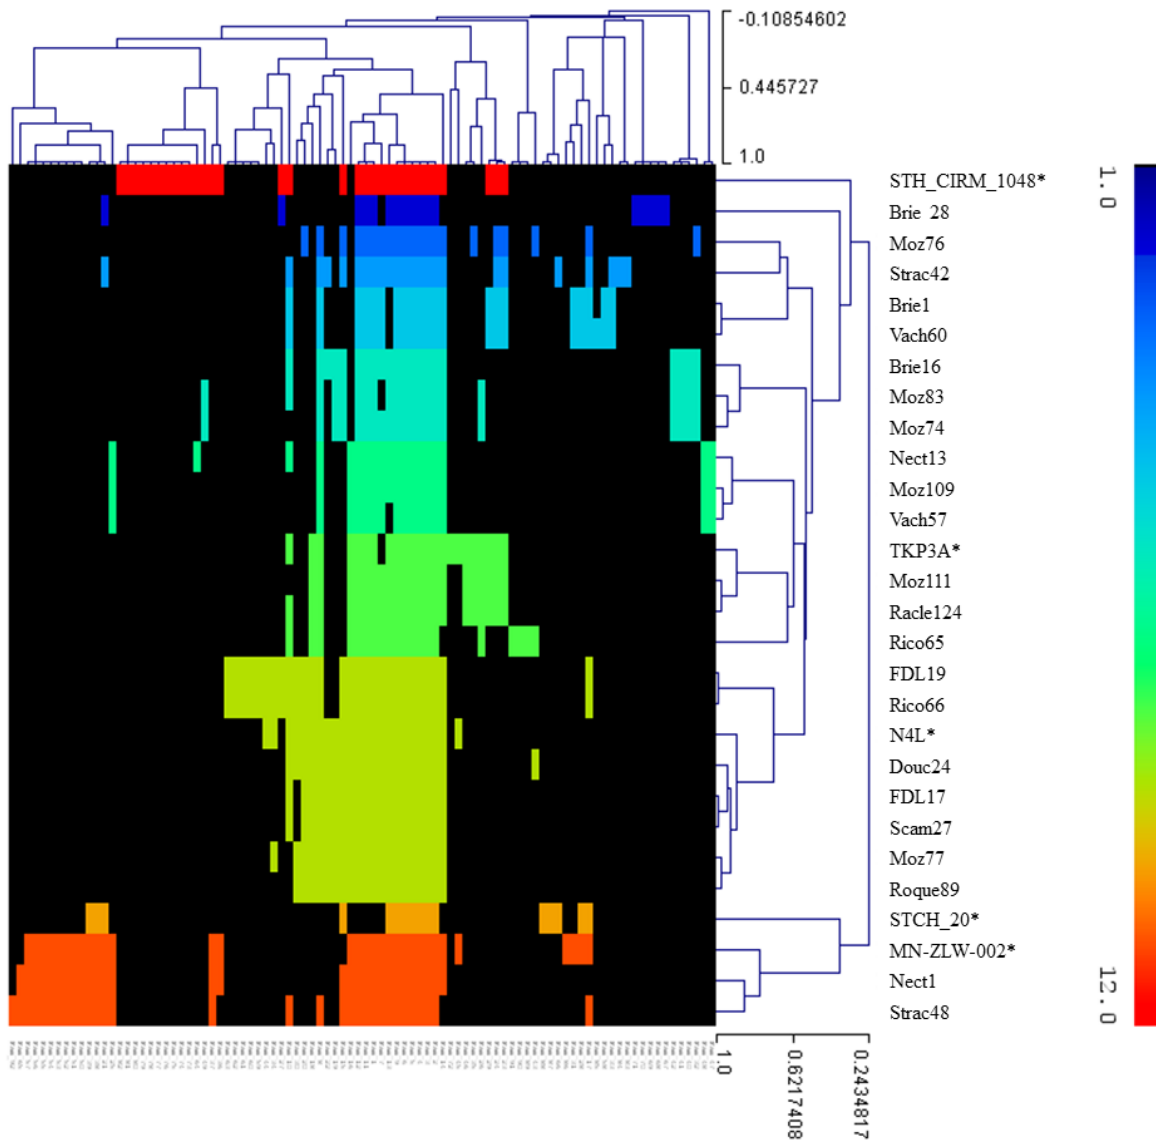

**Figure S2.** Heatmap displaying the presence (colour) or absence (black) of individual protein families within the EPS biosynthesis operon of 23 streptococcal strains sequenced in this study and 5 streptococcal strains used as reference (\*).

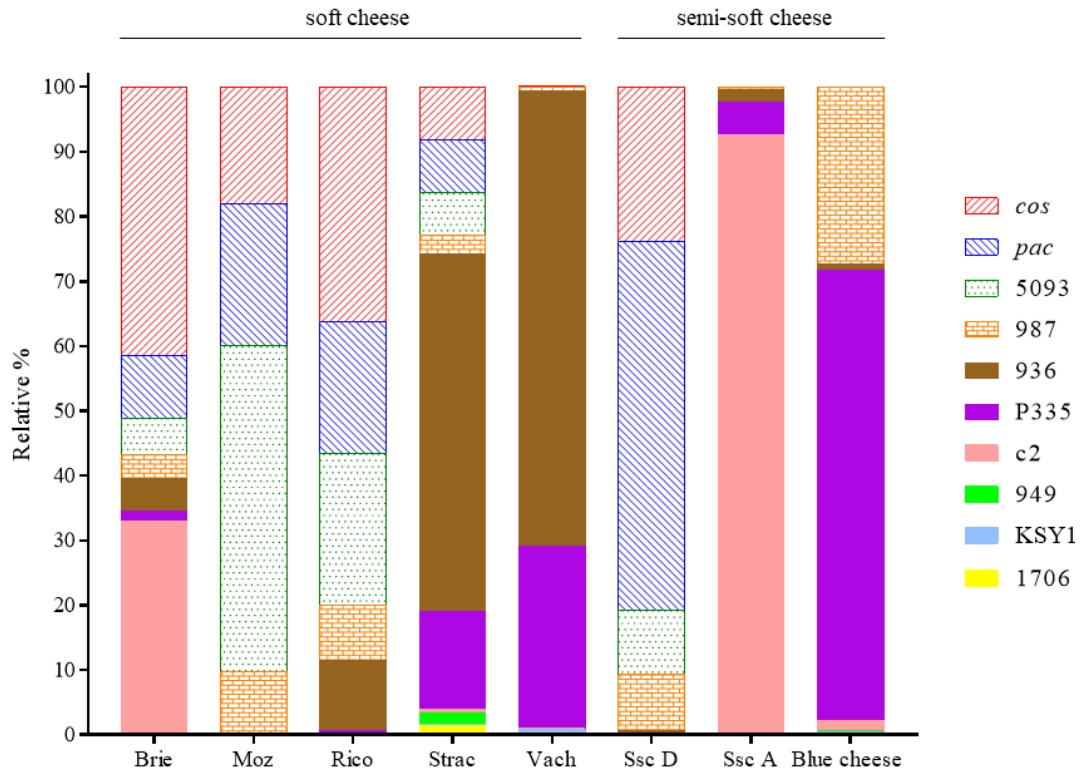

**Figure S3.** Relative % of reads mapping to streptococcal (coloured pattern: *cos*, *pac*, 5093, 987) and lactococcal (solid colour: 936, P335, c2, 949, KSY1, 1706) phage (*cos*, *pac*, 5093, 987) distribution in eight cheese samples – brie, mozzarella B (moz), ricotta (rico), straciatella (strac), vacherin (vach), semi-soft cheese D (ssc D), semi-soft cheese A (ssc A) and blue cheese, based on virome analysis. There were no reads mapped against members of the streptococcal P738 phage group lactococcal phage groups: P087, P034, 1358 and Q54.

**Table S4.** List of streptococcal phages (30) and their respective propagating host strains tested in this study.

| <b>Streptococcal phage</b> | <b>Group</b> | <b>Host strain</b> | <b>Reference</b>        |
|----------------------------|--------------|--------------------|-------------------------|
| SW1                        | <i>cos</i>   | UCCSt23            | Lavelle et al. 2018 [3] |
| SW2                        | <i>cos</i>   | UCCSt86            |                         |
| SW3                        | <i>cos</i>   | UCCSt83            |                         |
| SW4                        | 5093         | UCCSt89            |                         |
| SW5                        | <i>cos</i>   | UCCSt86            |                         |
| SW6                        | <i>cos</i>   | UCCSt95            |                         |
| SW7                        | <i>cos</i>   | UCCSt84            |                         |
| SW8                        | <i>cos</i>   | UCCSt89            |                         |
| SW9                        | <i>cos</i>   | UCCSt23            |                         |
| SW10                       | <i>cos</i>   | UCCSt23            |                         |
| SW11                       | <i>cos</i>   | UCCSt92            |                         |
| SW12                       | <i>cos</i>   | UCCSt96            |                         |
| SW13                       | <i>pac</i>   | UCCSt50            |                         |
| SW14                       | <i>pac</i>   | UCCSt96            |                         |
| SW15                       | <i>pac</i>   | UCCSt96            |                         |
| SW16                       | 987          | UCCSt97            |                         |
| SW18                       | <i>pac</i>   | UCCSt93            |                         |
| SW21                       | <i>cos</i>   | UCCSt82            |                         |
| SW24                       | 5093         | UCCSt89            |                         |
| SW25                       | 987          | UCCSt97            |                         |
| SW30                       | <i>cos</i>   | UCCSt95            |                         |
| SW40                       | <i>cos</i>   | UCCSt12            |                         |
| SW1151                     | <i>pac</i>   | UCCSt10            |                         |
| SWK4                       | <i>cos</i>   | UCCSt63            |                         |
| STP1                       | <i>cos</i>   | STP1               | Lavelle et al. 2018 [4] |
| SW41                       | <i>cos</i>   | UCCSt101           | Unpublished             |
| 9                          | <i>cos</i>   | UCCSt12            |                         |
| 12                         | <i>cos</i>   | UCCSt12            |                         |
| 14                         | <i>cos</i>   | UCCSt12            |                         |
| 20                         | <i>cos</i>   | UCCSt12            |                         |

**Table S5.** Percentage distribution of eukaryote, prokaryote and viruses, classified according to its genera/family and species, obtained from representative 100,000 reads.

| Sample              | Domain              | Genera/Family             | Species             | %    | Number of filtered reads* |
|---------------------|---------------------|---------------------------|---------------------|------|---------------------------|
| Brie                | Eukaryote           | <i>Phytophthora</i>       | Unknown             | 1.0  | 18,561                    |
|                     | Prokaryote          | <i>Brevibacterium</i>     | Unknown             | 67.2 |                           |
|                     |                     | <i>Brevibacterium</i>     | <i>aurantiacum</i>  | 3.3  |                           |
|                     |                     | <i>Corynebacterium</i>    | Unknown             | 2.8  |                           |
|                     |                     | <i>Brachybacterium</i>    | Unknown             | 2.7  |                           |
|                     |                     | <i>Glutamicibacter</i>    | Unknown             | 2.5  |                           |
|                     |                     | <i>Arthrobacter</i>       | Unknown             | 1.5  |                           |
|                     |                     | <i>Streptomyces</i>       | Unknown             | 1.4  |                           |
|                     |                     | <i>Ornithinimicrobium</i> | Unknown             | 1.3  |                           |
|                     |                     | <i>Kocuria</i>            | Unknown             | 1.3  |                           |
|                     |                     | <i>Nocardiopsis</i>       | Unknown             | 1.1  |                           |
|                     |                     | <i>Microbacterium</i>     | Unknown             | 1.1  |                           |
|                     |                     | <i>Cryobacterium</i>      | Unknown             | 1.0  |                           |
|                     |                     | <i>Gulosibacter</i>       | Unknown             | 1.0  |                           |
|                     |                     | <i>Dermabacter</i>        | Unknown             | 0.9  |                           |
|                     |                     | <i>Dermacoccus</i>        | Unknown             | 0.9  |                           |
|                     |                     | <i>Mycolicibacterium</i>  | Unknown             | 0.9  |                           |
|                     |                     | <i>Staphylococcus</i>     | Unknown             | 0.8  |                           |
|                     |                     | <i>Sinomonas</i>          | Unknown             | 0.7  |                           |
|                     |                     | <i>Rhodococcus</i>        | Unknown             | 0.7  |                           |
| <i>Gordonia</i>     | Unknown             | 0.7                       |                     |      |                           |
| <i>Nocardia</i>     | Unknown             | 0.6                       |                     |      |                           |
| <i>Salinicoccus</i> | Unknown             | 0.6                       |                     |      |                           |
| Virus               | <i>Siphoviridae</i> | Unknown                   | 3.9                 |      |                           |
| Mozarella B         | Prokaryote          | <i>Streptococcus</i>      | Unknown             | 2.0  | 94,051                    |
|                     |                     | <i>Streptococcus</i>      | <i>thermophilus</i> | 1.9  |                           |
|                     | Virus               | <i>Siphoviridae</i>       | Unknown             | 16.0 |                           |
|                     |                     | <i>Siphoviridae</i>       | Streptococcal       | 80.1 |                           |
| Semi-soft cheese D  | Eukaryote           | <i>Fusarium</i>           | Unknown             | 0.9  | 42,288                    |
|                     | Prokaryote          | <i>Pseudoalteromonas</i>  | Unknown             | 8.8  |                           |
|                     |                     | <i>Pseudoalteromonas</i>  | <i>translucida</i>  | 15.5 |                           |
|                     |                     | <i>Pseudoalteromonas</i>  | <i>arctica</i>      | 5.8  |                           |
|                     |                     | <i>Pseudoalteromonas</i>  | <i>distincta</i>    | 4.3  |                           |
|                     |                     | <i>Pseudoalteromonas</i>  | <i>nigrifaciens</i> | 4.0  |                           |
|                     |                     | <i>Pseudoalteromonas</i>  | <i>agarivorans</i>  | 0.7  |                           |
|                     |                     | <i>Pseudoalteromonas</i>  | <i>prydzensis</i>   | 0.6  |                           |
|                     |                     | <i>Vibrio</i>             | Unknown             | 3.9  |                           |
|                     |                     | <i>Vibrio</i>             | <i>casei</i>        | 5.2  |                           |
|                     |                     | <i>Vibrio</i>             | <i>toranzoniae</i>  | 2.2  |                           |
|                     |                     | <i>Streptococcus</i>      | <i>thermophilus</i> | 5.0  |                           |
|                     |                     | <i>Brevibacterium</i>     | Unknown             | 2.1  |                           |
|                     |                     | <i>Brevibacterium</i>     | <i>aurantiacum</i>  | 3.9  |                           |



|                       |            |                          |                          |                     |        |             |
|-----------------------|------------|--------------------------|--------------------------|---------------------|--------|-------------|
|                       |            | <i>Brachybacterium</i>   | Unknown                  | 2.1                 |        |             |
|                       |            | <i>Glutamicibacter</i>   | Unknown                  | 2.0                 |        |             |
|                       |            | <i>Glutamicibacter</i>   | <i>arilaitensis</i>      | 2.0                 |        |             |
|                       |            | <i>Psychrobacter</i>     | Unknown                  | 3.4                 |        |             |
|                       |            | <i>Psychrobacter</i>     | <i>immobilis</i>         | 0.9                 |        |             |
|                       | Virus      | <i>Autographiviridae</i> | Unknown                  | 5.3                 |        |             |
|                       |            | <i>Siphoviridae</i>      | Unknown                  | 8.6                 |        |             |
|                       |            | <i>Siphoviridae</i>      | Streptococcal            | 12.6                |        |             |
| Semi-soft<br>cheese A | Prokaryote | <i>Lactococcus</i>       | Unknown                  | 5.2                 | 70,469 |             |
|                       |            | <i>Lactococcus</i>       | <i>lactis</i>            | 27.0                |        |             |
|                       |            | <i>Halomonas</i>         | Unknown                  | 7.4                 |        |             |
|                       |            | <i>Halomonas</i>         | <i>titanicae</i>         | 0.9                 |        |             |
|                       |            | <i>Brevibacterium</i>    | Unknown                  | 0.6                 |        |             |
|                       |            | <i>Brevibacterium</i>    | <i>aurantiacum</i>       | 5.3                 |        |             |
|                       |            | <i>Psychrobacter</i>     | Unknown                  | 4.9                 |        |             |
|                       |            | <i>Bacillus</i>          | Unknown                  | 0.8                 |        |             |
|                       |            | <i>Bacillus</i>          | <i>altitudinis</i>       | 1.4                 |        |             |
|                       |            | <i>Staphylococcus</i>    | Unknown                  | 1.0                 |        |             |
|                       |            | <i>Brachybacterium</i>   | Unknown                  | 0.6                 |        |             |
|                       |            | <i>Halovibrio</i>        | Unknown                  | 0.6                 |        |             |
|                       |            | Virus                    | <i>Siphoviridae</i>      | Unknown             |        | 23.3        |
|                       |            |                          | <i>Siphoviridae</i>      | Lactococcal         |        | 20.9        |
| Ricotta               | Prokaryote | <i>Enterococcus</i>      | Unknown                  | 6.0                 | 75,882 |             |
|                       |            | <i>Enterococcus</i>      | <i>malodoratus</i>       | 1.8                 |        |             |
|                       |            | <i>Enterococcus</i>      | <i>avium</i>             | 1.5                 |        |             |
|                       |            | <i>Enterococcus</i>      | <i>xiangfangensis</i>    | 0.8                 |        |             |
|                       |            | <i>Enterococcus</i>      | <i>hermanniensis</i>     | 0.7                 |        |             |
|                       |            | <i>Streptococcus</i>     | Unknown                  | 3.1                 |        |             |
|                       |            | <i>Streptococcus</i>     | <i>thermophilus</i>      | 3.0                 |        |             |
|                       |            | <i>Lactococcus</i>       | Unknown                  | 1.0                 |        |             |
|                       |            | <i>Lactococcus</i>       | <i>lactis</i>            | 0.9                 |        |             |
|                       |            | <i>Vibrio</i>            | Unknown                  | 0.8                 |        |             |
|                       |            | Virus                    | <i>Siphoviridae</i>      | Unknown             |        | 26.9        |
|                       |            |                          | <i>Siphoviridae</i>      | Streptococcal       |        | 50.2        |
|                       |            |                          | <i>Siphoviridae</i>      | Lactococcal         |        | 3.3         |
| Blue cheese           | Prokaryote | <i>Lactococcus</i>       | Unknown                  | 6.8                 | 61,535 |             |
|                       |            | <i>Lactococcus</i>       | <i>lactis</i>            | 55.8                |        |             |
|                       |            | <i>Lactococcus</i>       | <i>petauri</i>           | 2.2                 |        |             |
|                       |            | <i>Staphylococcus</i>    | Unknown                  | 5.7                 |        |             |
|                       |            | <i>Brevibacterium</i>    | Unknown                  | 0.8                 |        |             |
|                       |            | Virus                    | <i>Autographiviridae</i> | Unknown             |        | 2.4         |
|                       |            |                          | <i>Herelleviridae</i>    | Unknown             |        | 2.4         |
|                       |            |                          | <i>Podoviridae</i>       | Unknown             |        | 0.9         |
|                       |            |                          | <i>Siphoviridae</i>      | Unknown             |        | 5.0         |
|                       |            |                          | <i>Siphoviridae</i>      | Streptococcal       |        | 0.7         |
|                       |            |                          |                          | <i>Siphoviridae</i> |        | Leuconostoc |

|              |            |                        |                       |      |        |
|--------------|------------|------------------------|-----------------------|------|--------|
|              |            | <i>Siphoviridae</i>    | Lactococcal           | 13.8 |        |
| Straciatella | Prokaryote | <i>Pseudomonas</i>     | Unknown               | 7.4  | 79,919 |
|              |            | <i>Pseudomonas</i>     | <i>proteolytica</i>   | 21.1 |        |
|              |            | <i>Pseudomonas</i>     | <i>helleri</i>        | 17.1 |        |
|              |            | <i>Pseudomonas</i>     | <i>qingdaonensis</i>  | 16.7 |        |
|              |            | <i>Pseudomonas</i>     | <i>lundensis</i>      | 5.6  |        |
|              |            | <i>Pseudomonas</i>     | <i>carnis</i>         | 5.2  |        |
|              |            | <i>Pseudomonas</i>     | <i>lactis</i>         | 2.5  |        |
|              |            | <i>Pseudomonas</i>     | <i>gessardii</i>      | 1.4  |        |
|              |            | <i>Pseudomonas</i>     | <i>rhodesiae</i>      | 0.6  |        |
|              |            | <i>Pseudomonas</i>     | <i>brenneri</i>       | 0.6  |        |
|              |            | <i>Buttiauxella</i>    | Unknown               | 1.9  |        |
|              |            | <i>Buttiauxella</i>    | <i>gaviniae</i>       | 5.8  |        |
|              |            | <i>Buttiauxella</i>    | <i>noackiae</i>       | 1.1  |        |
|              |            | <i>Buttiauxella</i>    | <i>brennerae</i>      | 0.8  |        |
|              |            | <i>Serratia</i>        | <i>liquefaciens</i>   | 4.5  |        |
|              |            | <i>Carnobacterium</i>  | <i>maltaromaticum</i> | 2.6  |        |
|              |            | <i>Leuconostoc</i>     | <i>mesenteroides</i>  | 1.6  |        |
|              |            | <i>Streptococcus</i>   | <i>thermophilus</i>   | 1.2  |        |
|              |            | <i>Kluyvera</i>        | <i>intermedia</i>     | 0.9  |        |
|              |            | <i>Shewanella</i>      | <i>baltica</i>        | 0.7  |        |
|              |            | <i>Hafnia</i>          | <i>paralvei</i>       | 0.6  |        |
| Vacherin     | Prokaryote | <i>Lactococcus</i>     | Unknown               | 1.6  | 69,906 |
|              |            | <i>Lactococcus</i>     | <i>lactis</i>         | 73.0 |        |
|              |            | <i>Brevibacterium</i>  | Unknown               | 0.7  |        |
|              |            | <i>Brevibacterium</i>  | <i>aurantiacum</i>    | 8.1  |        |
|              |            | <i>Glutamicibacter</i> | Unknown               | 3.8  |        |
|              |            | <i>Glutamicibacter</i> | <i>arilaitensis</i>   | 0.9  |        |
|              |            | <i>Psychrobacter</i>   | Unknown               | 3.7  |        |
|              |            | <i>Psychrobacter</i>   | <i>immobilis</i>      | 1.2  |        |
|              |            | <i>Lactobacillus</i>   | <i>paracasei</i>      | 1.6  |        |
|              |            | <i>Halomonas</i>       | Unknown               | 0.8  |        |
|              |            | <i>Brachybacterium</i> | Unknown               | 0.8  |        |
|              | Virus      | <i>Siphoviridae</i>    | Unknown               | 2.2  |        |
|              |            | <i>Siphoviridae</i>    | Lactococcal           | 1.5  |        |

\* Number of filtered reads obtained from 100,000 representative reads.

## Reference

1. **Corsetti A, Settanni L, Van Sinderen D.** Characterization of Bacteriocin-Like Inhibitory Substances (BLIS) from Sourdough Lactic Acid Bacteria and Evaluation of Their *In Vitro* and *In Situ* Activity. *J Appl Microbiol.* 2004;96(3):521-34, doi:10.1111/j.1365-2672.2004.02171.x.
2. **Kouwen RHM, Van Sinderen D, McDonnell B, Ver Loren Van Themaat P, Emiel, Mahony J.** *Streptococcus thermophilus* starter cultures, Netherlands, Patent 20190367866, 2019.
3. **Lavelle K, Martinez I, Neve H, Lugli GA, Franz CMAP, Ventura M, et al.** Biodiversity of *Streptococcus thermophilus* Phages in Global Dairy Fermentations. *Viruses.* 2018;10(10):577, doi:10.3390/v10100577.
4. **Lavelle K, Murphy J, Fitzgerald B, Lugli GA, Zomer A, Neve H, et al.** A Decade of *Streptococcus thermophilus* Phage Evolution in an Irish Dairy Plant. *Appl Environ Microbiol* 2018;84(10):e02855-17, doi:10.1128/aem.02855-17.
